# Supplementary material for: The Communication, Awareness, Relationships and Empowerment (C.A.R.E.) Model: An Effective Tool for Engaging Urban Communities in Community-Based Participatory Research
Source: Int J Environ Res Public Health. 2017 Nov 21;14(11):1422. doi: 10.3390/ijerph14111422 (PMC5708061; doi:10.3390/ijerph14111422)
Supplement: Supplementary file 1 [file ijerph-14-01422-s001.pdf]

# Heart Health Screening

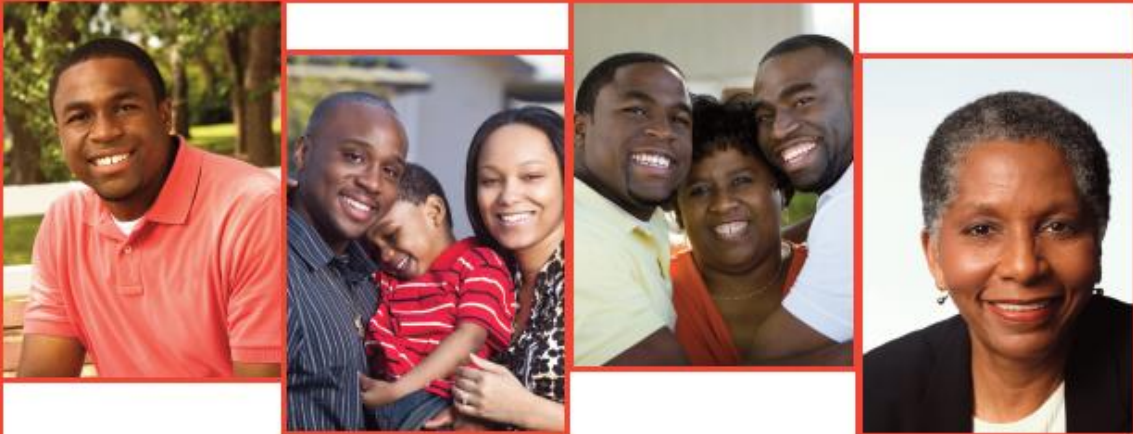

*Researchers at the National Heart, Lung and Blood Institute at the National Institutes of Health (NIH) Clinical Center in Bethesda, Maryland, seek volunteers who could possibly be at risk for obesity and heart health issues.*

*Participate in a heart health screening and needs assessment that will assess your body mass index (BMI), physical activity, dietary intake, cholesterol level, blood pressure, and blood sugar.*

*There is no cost to you for study-related tests. Participants will receive compensation after completing each part of the study.*

|                                                                                                                                                    |                                                                |
|----------------------------------------------------------------------------------------------------------------------------------------------------|----------------------------------------------------------------|
| <i>You may be eligible if you:</i>                                                                                                                 | <i>You may not be eligible if you:</i>                         |
| <ul style="list-style-type: none"><li>• Are 19-85 years of age</li><li>• Attend this church</li><li>• Are able to read and speak English</li></ul> | <ul style="list-style-type: none"><li>• Are pregnant</li></ul> |

**For more information, please call:**  
**301-594-3735 (TTY: 1-866-411-1010)**  
**Or go online, [clinicaltrials.gov](http://clinicaltrials.gov)**  
**Search for study: 13-H-0183**

NIH...Turning Discovery Into Health Site:

**Department of Health and Human Services  
National Institutes of Health  
National Heart, Lung and Blood Institute**

**Figure 1.** Culturally tailored flyer used for community awareness and recruitment.

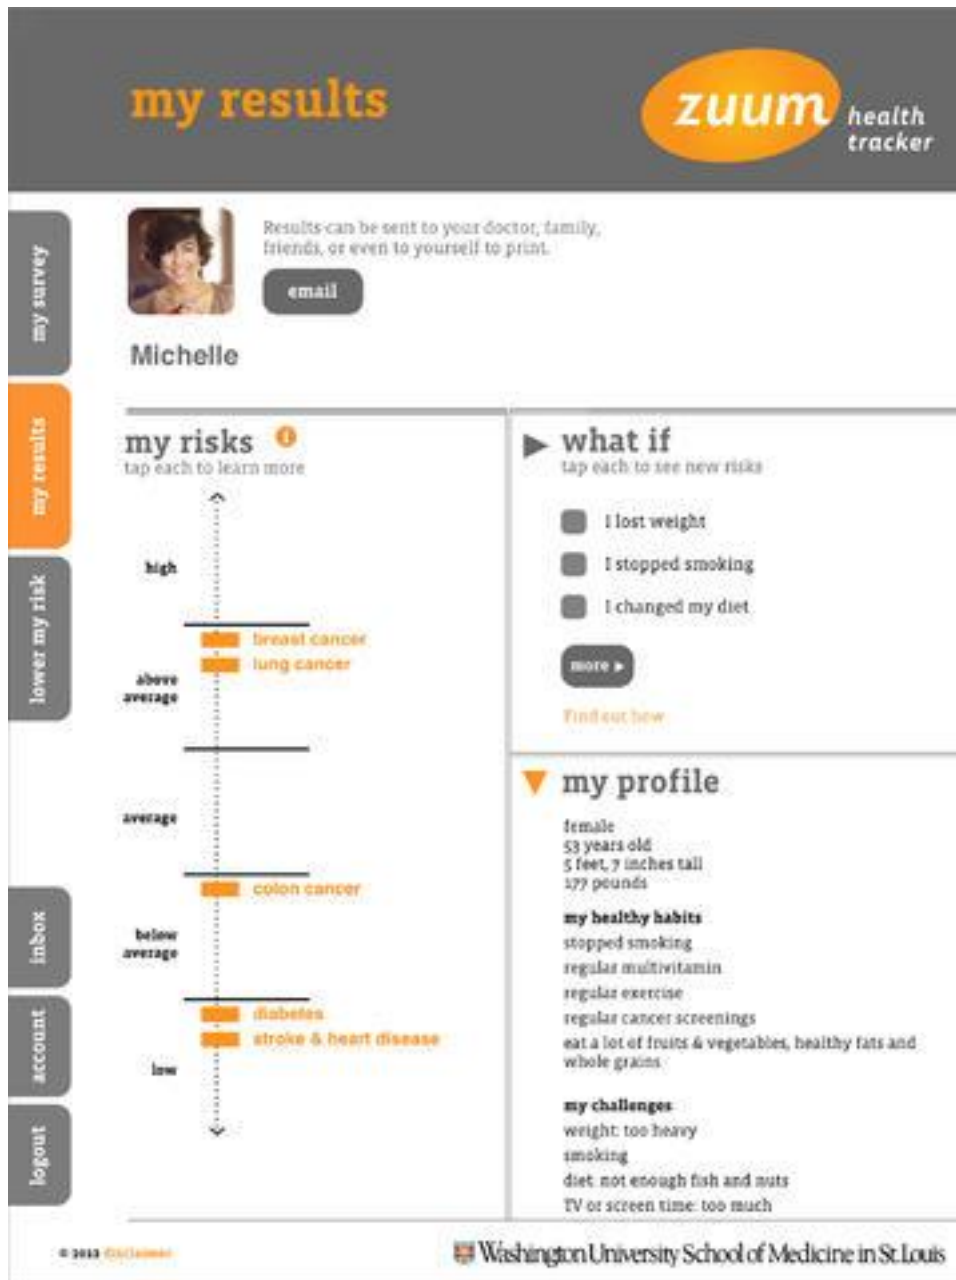

**Figure 2** Screenshot of the Zuum application used to provide cardiovascular health risk assessments. (Please provide us a sufficiently high-resolution figures (minimum 1000 pixels width/height, or a resolution of 300 dpi or higher), we could not see the letters clearly.)
